# Supplementary material
Source: PubMed Central journal article supplement (PMC2914816)

## **Supporting Information**

### **An Alternative Mechanism for UDP-diacylglucosamine Hydrolysis during Bacterial Lipid A Biosynthesis**

Louis E. Metzger IV<sup>†</sup> and Christian R. H. Raetz<sup>†\*</sup>

<sup>†</sup>Department of Biochemistry, Duke University Medical Center, Durham, NC 27710

**Supporting Table 1. Relevant primers for this study.**

| <b>Name</b> | <b>Purpose</b>                                                                                                                                                                                                                                                                                     | <b>Primer sequence (5' to 3' orientation)</b>                                     |
|-------------|----------------------------------------------------------------------------------------------------------------------------------------------------------------------------------------------------------------------------------------------------------------------------------------------------|-----------------------------------------------------------------------------------|
| EcH_FW      | To amplify <i>E. coli lpxH</i> , confers a 5' <i>ndel</i> restriction site                                                                                                                                                                                                                         | GCTGATTCATTTTCCGTTTTTCAGGA                                                        |
| EcH_RV      | To amplify <i>E. coli lpxH</i> , confers a 3' <i>bamH1</i> restriction site                                                                                                                                                                                                                        | GAGCTCGAATTCGGATCCTGAAAAC                                                         |
| Ccl_FW      | To amplify <i>C. crescentus lpxI</i> , confers a 5' <i>ndel</i> restriction site                                                                                                                                                                                                                   | CTGAATTCATATGCGTAAGCTTGG                                                          |
| Ccl_RV      | To amplify <i>C. crescentus lpxI</i> , confers a 3' <i>bamH1</i> restriction site                                                                                                                                                                                                                  | GTCAATTGGATCCTCACGGCCGCT                                                          |
| KanFlank_FW | To amplify a Kan <sup>R</sup> cassette from pET28b, while adding a ribosome binding site 7 bases 5' to the start codon. Note that 5' to the engineered ribosome binding site, this primer is complementary to the 41 base pairs immediately flanking <i>lpxH</i> on the <i>E. coli</i> chromosome. | GAAGACGTTATCATTGAAAGCGTGACCGTTAGCGAGTAATCAG<br>GAGATATAACAATGAGCCATATTCAACGGGAAAC |
| KanFlank_RV | To amplify a Kan <sup>R</sup> cassette from pET28b, while adding a 3', 49 base pair overhang complementary to the region of the <i>E. coli</i> chromosome immediately 3' to the stop codon of <i>lpxH</i> .                                                                                        | GCAAGGAAAACGGTTGCGTGGCTGTGAAATCAGCAAAGTTGC<br>GGTTTTTTAGAAAACTCATCGAGCATC         |
| Kan_FW      | Complementary to a region of the <i>E. coli</i> chromosome 100 base pairs 5' to <i>lpxH</i>                                                                                                                                                                                                        | GTGTTTGCTGAAGTGGTTGACGGCAT                                                        |
| Kan_RV      | Complementary to a region of the <i>E. coli</i> chromosome 100 base pairs 3' to <i>lpxH</i>                                                                                                                                                                                                        | CCCAGTCGCTTTTGGACCCCATCACG                                                        |
| pBAD_FW     | Complementary to the pBAD promoter                                                                                                                                                                                                                                                                 | ATGCCATAGCATTTTTATCC                                                              |
| pBAD_RV     | Complementary to the pBAD terminator                                                                                                                                                                                                                                                               | GATTTAATCTGTATCAGG                                                                |
|             |                                                                                                                                                                                                                                                                                                    |                                                                                   |

**Supporting Table 2. Distribution of *E. coli* LpxH and *C. crescentus* LpxI orthologues among bacteria with completely sequenced genomes.** Those that contain *E. coli* LpxC orthologues are presumed to synthesize lipid A. The sequences were obtained from ([http://www.ncbi.nlm.nih.gov/sutils/genom\\_tree.cgi](http://www.ncbi.nlm.nih.gov/sutils/genom_tree.cgi)).

|                       | <i>E. coli</i> LpxC<br>Orthologues | <i>E. coli</i> LpxH1<br>Orthologues | <i>C. crescentus</i><br>LpxI Orthologues |
|-----------------------|------------------------------------|-------------------------------------|------------------------------------------|
| <b>Proteobacteria</b> |                                    |                                     |                                          |
| Alpha                 | 89/92                              | 2/92                                | 71/92                                    |
| Beta                  | 54/54                              | 54/54                               | 0/54                                     |
| Gamma                 | 132/132                            | 132/132                             | 0/132                                    |
| Epsilon               | 16/16                              | 16/16                               | 0/16                                     |
| Delta                 | 29/29                              | 11/29                               | 18/29                                    |
| Others                | 1/1                                | 0/1                                 | 1/1                                      |
| <b>Bacteroides</b>    | 31/33                              | 32/33                               | 0/33                                     |
| <b>Chlamydiae</b>     | 7/7                                | 0/7                                 | 0/7                                      |
| <b>Spirochaetales</b> | 5/17                               | 0/17                                | 4/17                                     |
| <b>Actinobacteria</b> | 0/75                               | 0/75                                | 0/75                                     |
| <b>Cyanobacteria</b>  | 26/26                              | 0/26                                | 0/26                                     |
| <b>Mycoplasma</b>     | 0/21                               | 0/21                                | 0/21                                     |
| <b>Firmicutes</b>     | 5/103                              | 0/103                               | 4/103                                    |
| <b>Others</b>         | 35/53                              | 2/53                                | 22/53                                    |

**Supporting Fig. 1.** Expression and *in vitro* UDP-diacylglucosamine pyrophosphatase activity of the CC1910 gene product. Panel A. A 12% SDS-PAGE analysis of cell extracts. MW denotes the molecular weight markers, VC\_21b and Ccl\_21b denote *E. coli* C41(DE3) cells expressing either the pET21b vector or the induced pET21b hybrid plasmid harboring CC1910, respectively. Each lane contains 20  $\mu$ g of protein. Panel B. A qualitative silica TLC analysis for UDP-2,3,-diacylglucosamine hydrolase activity in cell-free extracts. Lane 1, 0.6 mg/ml lysate from strain VC\_21b; Lanes 2-5, from left to right, 0.6, 0.06, 0.006, or 0.0006 mg/ml of lysate from induced Ccl\_21b. The assay duration was 30 minutes. Lipid substrate and product were detected after TLC by charring with 10% sulfuric acid in ethanol. NE: no enzyme.

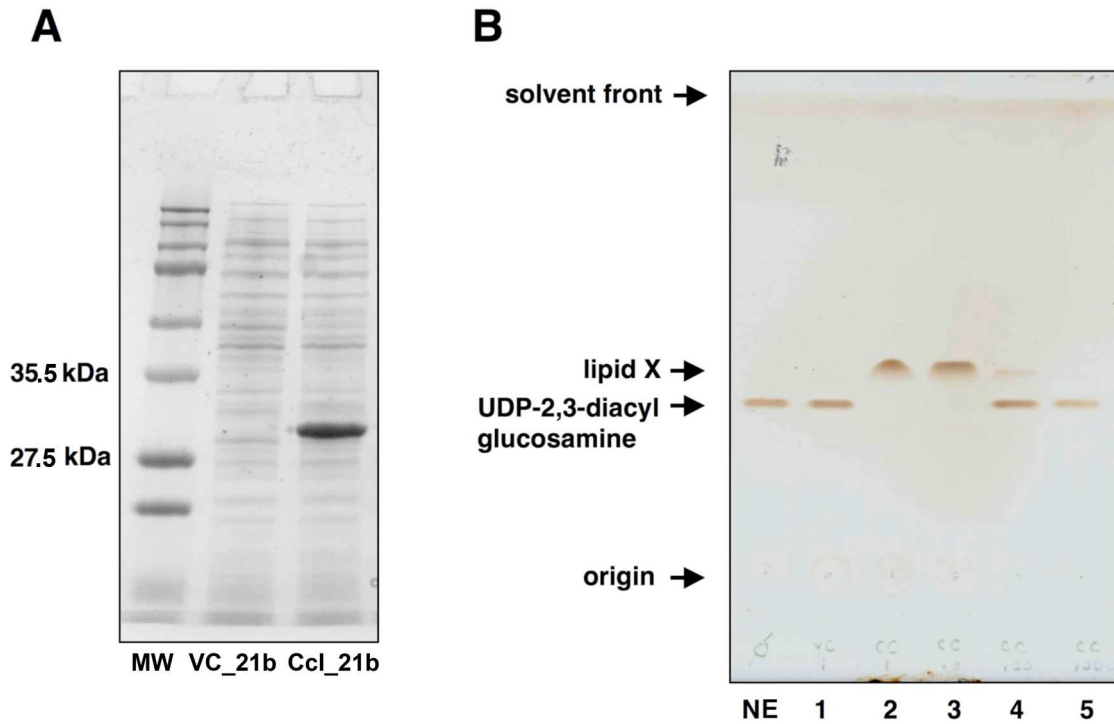

**Supporting Fig. 2.** Expression of *C. crescentus lpxI* permits deletion of *lpxH* in *E. coli*. The *lpxH* gene could be replaced with a *kan* cassette by linear recombination in *E. coli* DY330 (19), provided that a covering plasmid expressing either EcLpxH or CcLpxI was also present, as described in the methods section. In both cases, kanamycin resistant transformants were observed (middle and right plates), whereas in the vector control (left plate) no kanamycin resistant colonies were obtained. Deletion of the *lpxH* gene in kanamycin resistant transformants was confirmed by PCR and DNA sequencing.

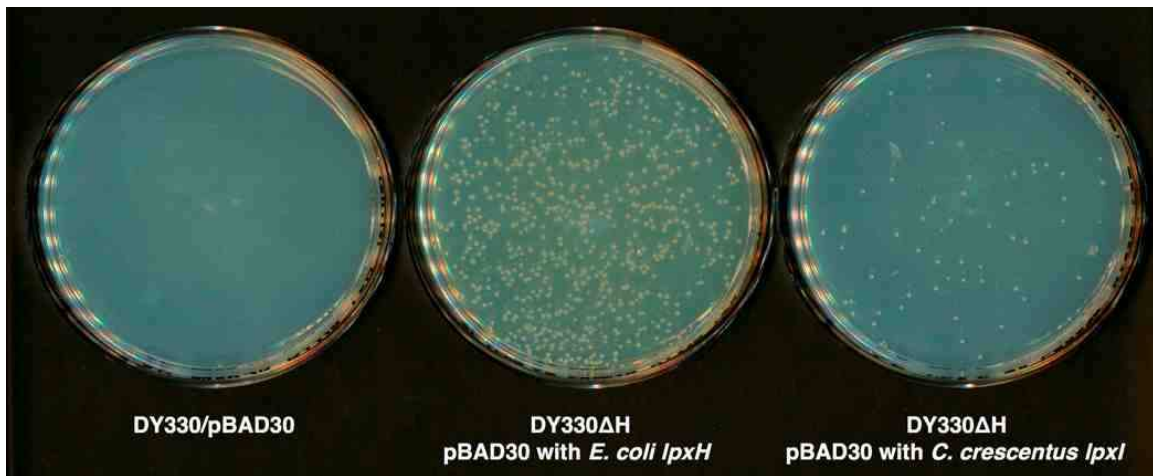

Supplement: NIHMS221120-supplement-1_si_001.pdf [file NIHMS221120-supplement-1_si_001.pdf]
